# Supplementary material
Source: HighWire-hosted journal article supplement (http://ebm.bmjjournals.com/highwire/filestream/142101/field_highwire_adjunct_files/1/supp2.docx)
Supplement: supp2.docx [file supp2.docx]

Medium to long-term psychological consequences of false-positive screening mammograms in the UK: a systematic review

What this paper adds

What is already known

- Evidence from wide ranging systematic reviews about the psychological impact of false-positive mammograms, including effects on screening reattendance, give conflicting results

What this study adds

In the UK population:

- There may be breast cancer specific distress that lasts up to three years
- That the degree of distress is related to the invasiveness of the assessment procedure
- It is unlikely that general anxiety or depression at pathological levels will be found
- Women with false-positive mammograms may be less likely to return for routine screening than women with normal mammograms.
